# Supplementary material for: Photoactive lanthanide (Eu3+, Tb3+) centered hybrid systems with titania (alumina)-mesoporous silica based hosts
Source: Royal Society of Chemistry journal article supplement (doi:10.1039/c1jm13650j), 2011-01-01
Supplement: c1jm13650j.pdf [file c1jm13650j.pdf]

## Supporting Information

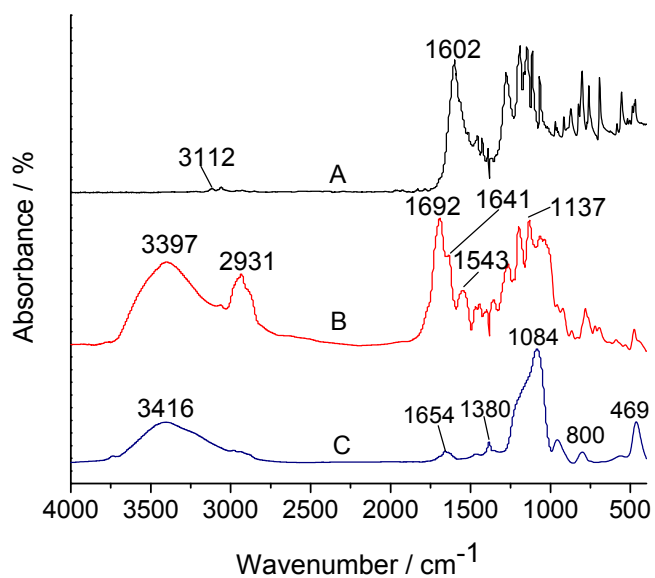

Figure S1. FTIR spectra of NTA(A), NTA-Si (B) and NTA-functionalized mesoporous hybrid material NTA-S15 (C).
